# Supplementary material
Source: PubMed Central journal article supplement (PMC3535928)
Supplement: AAC.01632-12_zac999101461so1.pdf [file AAC.01632-12_zac999101461so1.pdf]

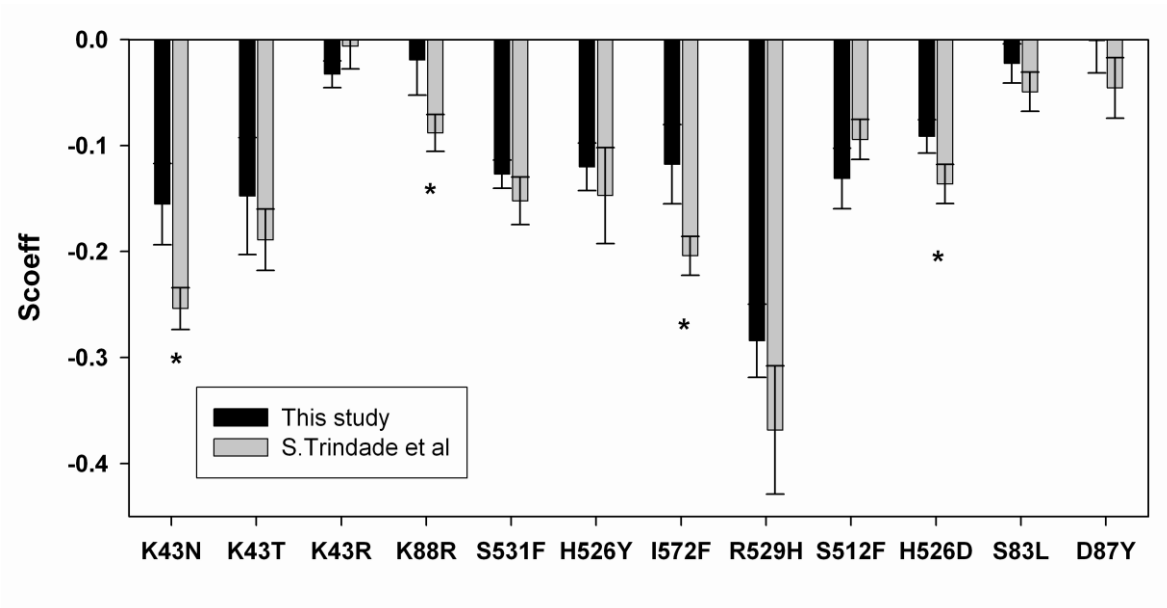

**Figure S1.** Fitness of antibiotic resistant clones in LB media. The asterisk (\*) represents statistical significant difference ( $p < 0.05$ ) using Wilcoxon sum rank test without Bonferroni correction.
